# Supplementary material for: Approaching a high-rate and sustainable production of hydrogen peroxide: oxygen reduction on Co–N–C single-atom electrocatalysts in simulated seawater
Source: Royal Society of Chemistry journal article supplement (doi:10.1039/d1ee00878a), 2021-01-01
Supplement: d1ee00878a1.pdf [file d1ee00878a1.pdf]

## Supporting Information

### Approaching a High-Rate and Sustainable Production of Hydrogen Peroxide: Oxygen Reduction on Co-N-C Single-Atom Electrocatalysts in Simulated Seawater

Qinglan Zhao,<sup>‡a\*</sup> Yian Wang,<sup>‡a</sup> Wei-Hong Lai,<sup>‡b</sup> Fei Xiao,<sup>a</sup> Yuxiang Lyu,<sup>a</sup> Caizhi Liao,<sup>c</sup> and Minhua Shao<sup>a,d\*</sup>

<sup>a</sup> Department of Chemical and Biological Engineering, The Hong Kong University of Science and Technology, Clear Water Bay, Kowloon, Hong Kong, China.

<sup>b</sup> Institute for Superconducting & Electronic Materials, Innovation Campus, University of Wollongong, Wollongong, New South Wales, Australia.

<sup>c</sup> Creative Biosciences (Guangzhou) Co., Ltd., Guangzhou, 510535, China.

<sup>d</sup> Energy Institute, Hong Kong Branch of the Southern Marine Science and Engineering Guangdong Laboratory, and Chinese National Engineering Research Center for Control & Treatment of Heavy Metal Pollution, The Hong Kong University of Science and Technology, Clear Water Bay, Kowloon, Hong Kong, China.

<sup>‡</sup> These authors contributed equally to this work.

\* Email: keqzhao@ust.hk, kemshao@ust.hk

## Results

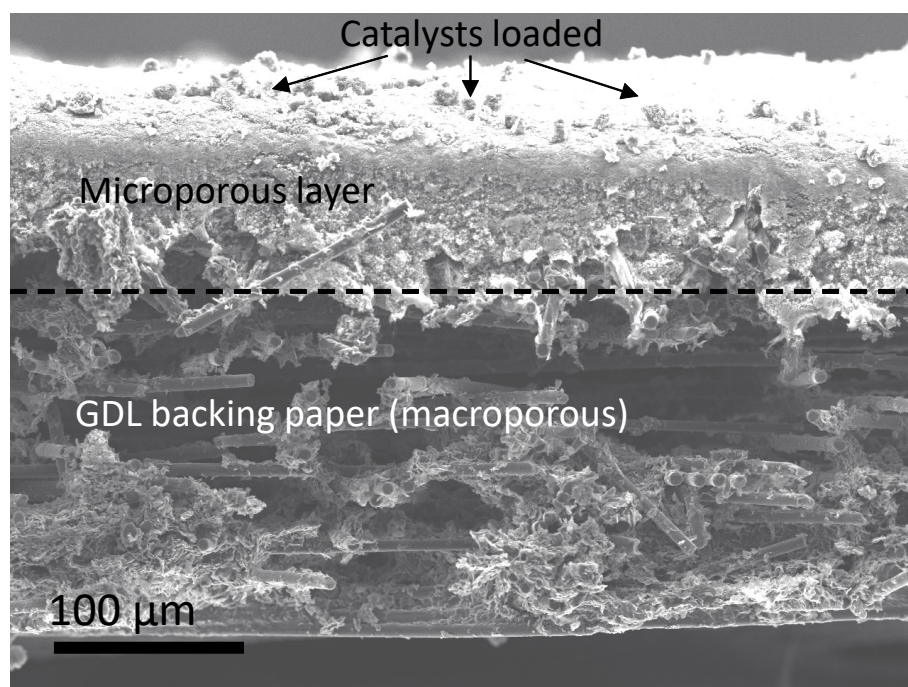

Figure S1. Cross-sectional scanning electron microscopy (SEM) image of Co-N-C catalysts on a Sigracet 39BB gas diffusion layer. (A catalyst loading of  $2 \text{ mg cm}^{-2}$  was sprayed on the carbon paper for a clearer image of catalyst distribution.)

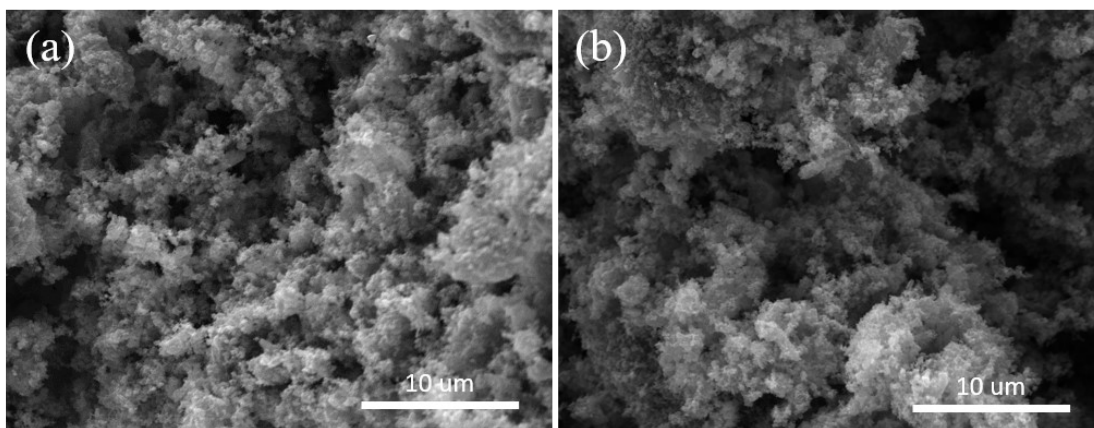

Figure S2. Scanning electron microscopy (SEM) images of (a) Co-N-C and (b) N-C samples.

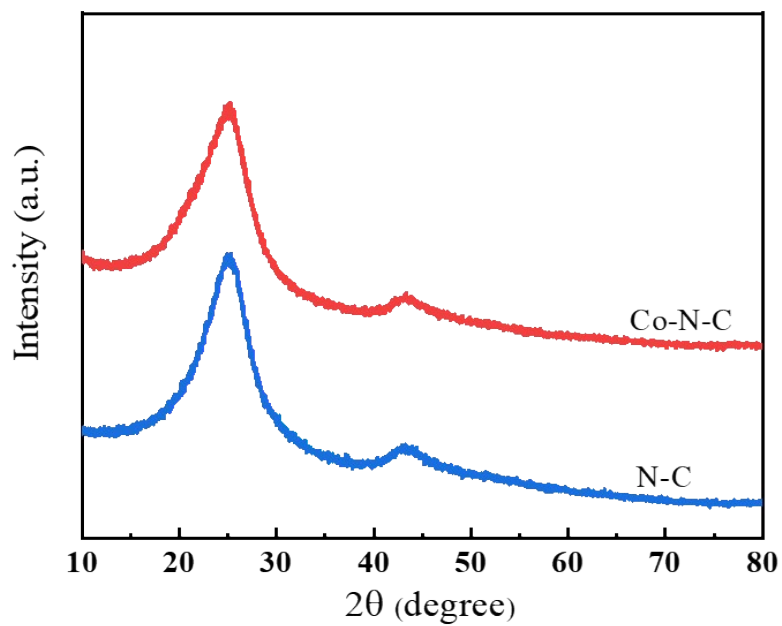

Figure S3. X-ray diffraction (XRD) patterns of the Co-N-C and N-C samples.

Table S1. Co content determined by X-ray photoelectron spectroscopy (XPS) and inductively coupled plasma mass spectrometry (ICP-MS).

| Method        | C     | N    | Co   |
|---------------|-------|------|------|
| XPS (at.%)    | 87.56 | 11.8 | 0.64 |
| ICP-MS (wt.%) | -     | -    | 0.97 |

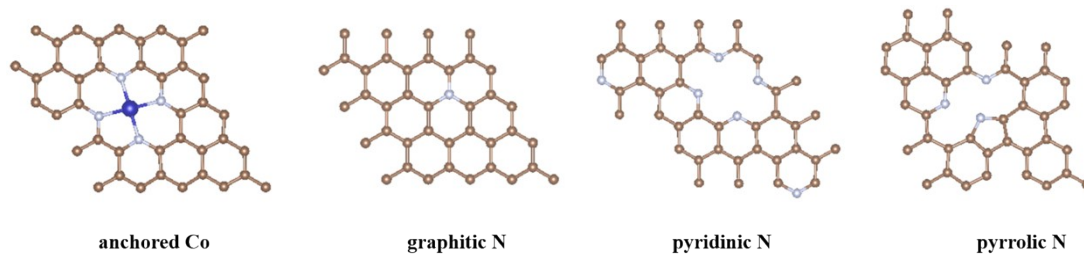

Figure S4. Top views of anchored Co, graphitic N, pyridinic N, and pyrrolic N.

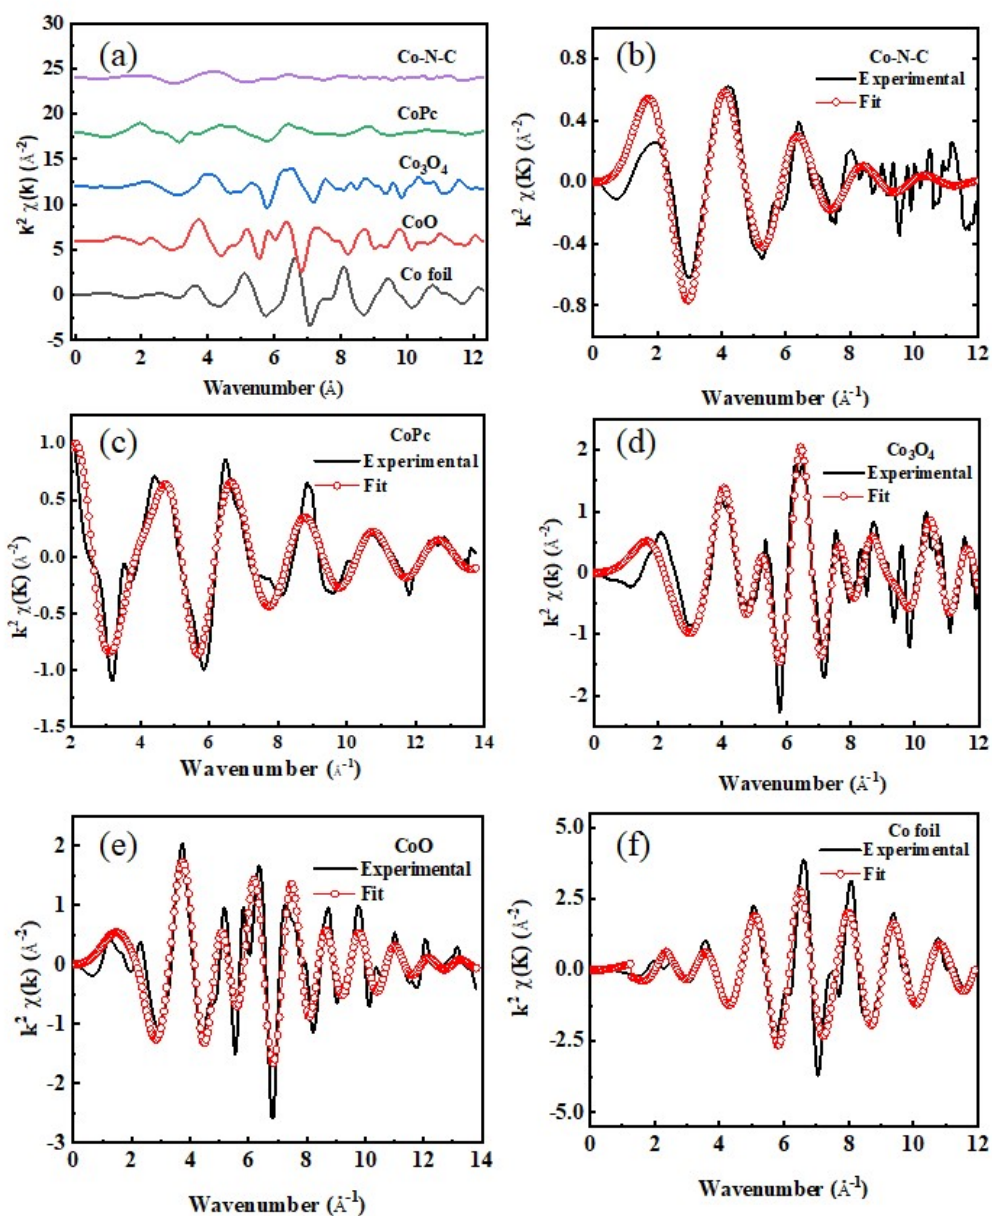

Figure S5. (a)  $k^2$ -weighted EXAFS spectra and (b-f) the corresponding fitting curves of Co-N-C, CoPc,  $\text{Co}_3\text{O}_4$ , CoO, and Co foil.

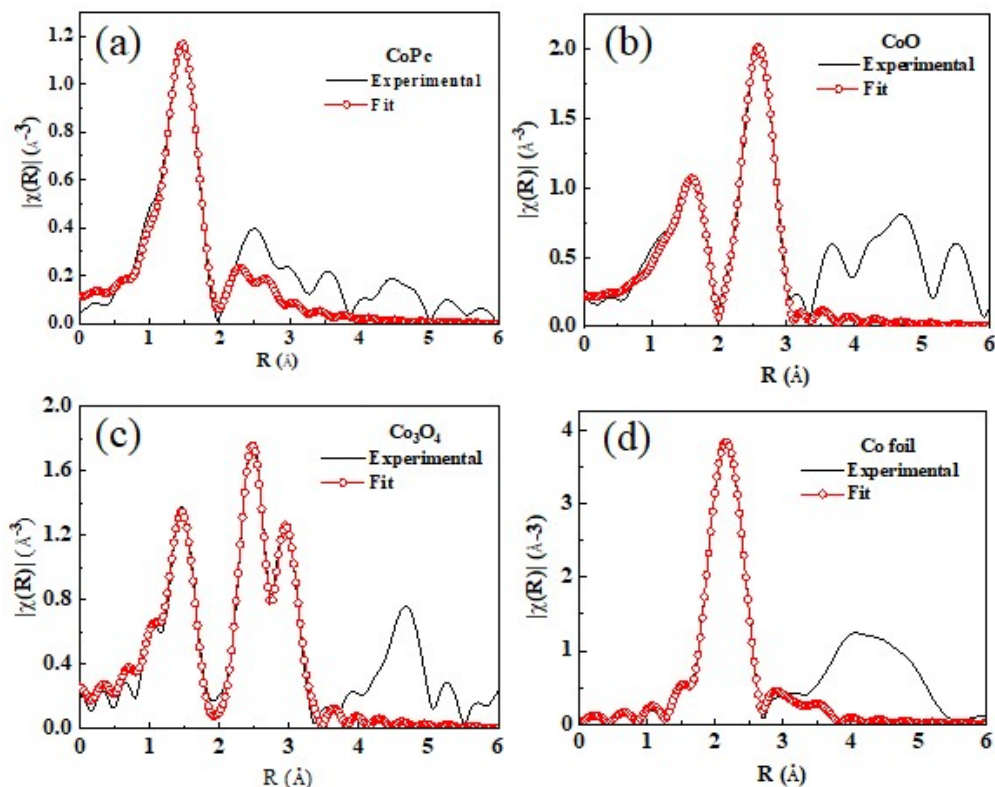

Figure S6. FT-EXAFS fitting curves of (a) CoPc, (b) CoO, (c) Co<sub>3</sub>O<sub>4</sub>, and (d) Co foil in R space.

Table S2. EXAFS fitting parameters at the Co K-edge for Co-N-C and standard samples.

|                                | Path   | N    | $\Delta E$ (eV) | $100 \times R$ (Å) | $100 \times \sigma^2$ (Å <sup>2</sup> ) | R-factor |
|--------------------------------|--------|------|-----------------|--------------------|-----------------------------------------|----------|
| Co foil                        | Co-Co  | 12.0 | 6.80 (0.51)     | 249.0 (0.3)        | 5.67 (0.43)                             | 0.001    |
| CoO                            | Co-O   | 6.0  | -1.10 (2.08)    | 211.0 (1.9)        | 9.40 (1.71)                             | 0.008    |
|                                | Co-Co  | 12.0 | -3.42 (1.19)    | 300.2 (0.9)        | 10.22 (0.90)                            |          |
|                                | Co-O   | 5.3  | -7.35 (1.46)    | 191.3 (0.8)        | 2.67 (0.69)                             |          |
| Co <sub>3</sub> O <sub>4</sub> | Co-Co1 | 4.0  | -7.72 (0.77)    | 285.3 (0.5)        | 2.54 (0.50)                             | 0.005    |
|                                | Co-Co2 | 9.3  | -7.72 (0.77)    | 358.8 (0.7)        | 6.10 (0.62)                             |          |
| CoPc                           | Co-N   | 4.0  | 5.46(1.12)      | 191.8(2.1)         | 3.92(0.46)                              | 0.005    |
| Co-N-C                         | Co-N   | 5.2  | -3.72 (1.68)    | 197.4 (8.3)        | 11.28 (2.13)                            | 0.008    |

(0.70)

The amplitude reduction factor  $S_0^2$  was determined to be 0.72 through fitting the FT-EXAFS of standard Co foil which was measured simultaneously during the experiment.  $N$ , coordination number;  $\Delta E$ , threshold energy correction;  $R$ , distance between absorber and backscatter atoms;  $\sigma^2$ , Debye-Waller factor to describe the variance due to disorder

(both lattice and thermal); the  $R$ -factor indicates the goodness of the fit.

Table S3. The range of the data used in the fitting for Co-N-C and standard samples in  $k$ -space and  $R$ -space.

| Sample                         | $k$ space              | $R$ space           |
|--------------------------------|------------------------|---------------------|
| Co foil                        | $3.0 \leq k \leq 10.5$ | $1 \leq R \leq 2.7$ |
| CoO                            | $3.2 \leq k \leq 11.2$ | $1 \leq R \leq 3.4$ |
| Co <sub>3</sub> O <sub>4</sub> | $3.5 \leq k \leq 13.1$ | $1 \leq R \leq 3.4$ |
| CoPc                           | $3.0 \leq k \leq 10.6$ | $1 \leq R \leq 2.2$ |
| Co-N-C                         | $3.0 \leq k \leq 10.5$ | $1 \leq R \leq 2.4$ |

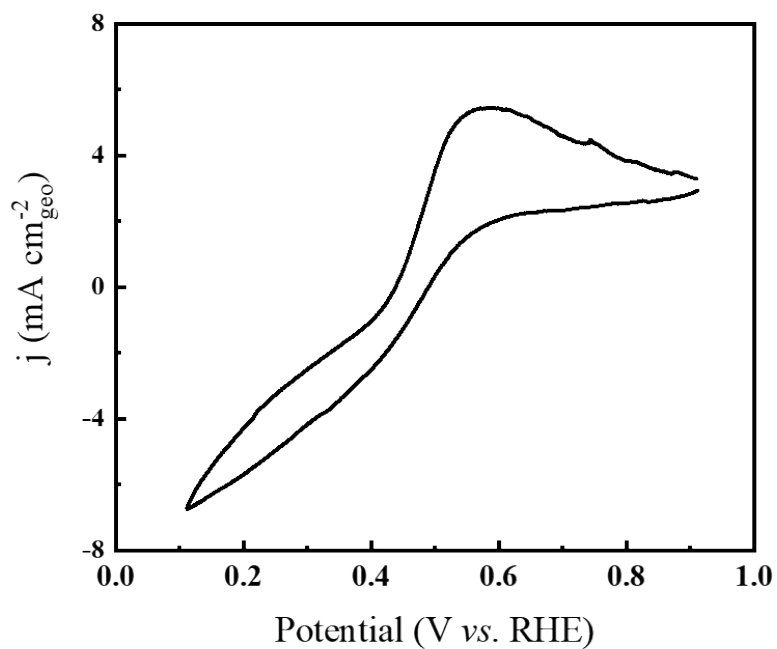

Figure S7. CV curve of Co-N-C catalyst in an  $\text{N}_2$  saturated 0.5M NaCl containing 0.2M  $\text{H}_2\text{O}_2$ .



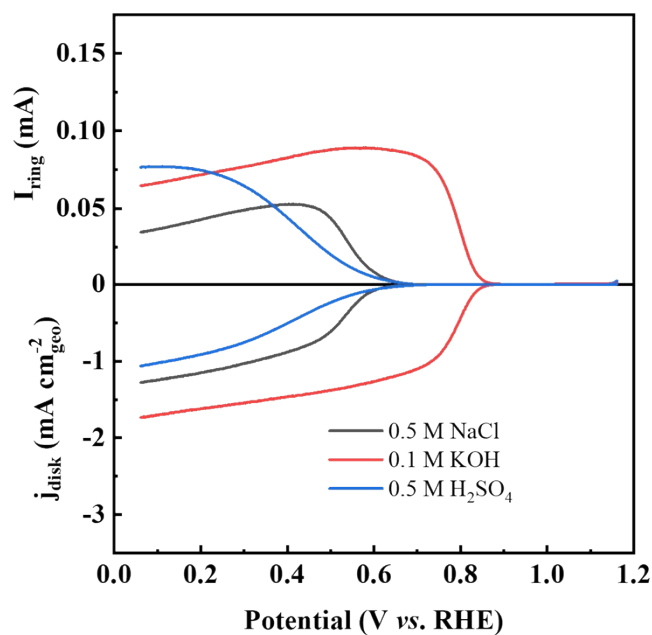

Figure S8. Linear sweep voltammetry (LSV) curves of Co-N-C at different electrolytes with various pH values in a RRDE setup with the ring current was collected on the Pt ring at a constant potential of  $+1.26 V_{\text{RHE}}$ .

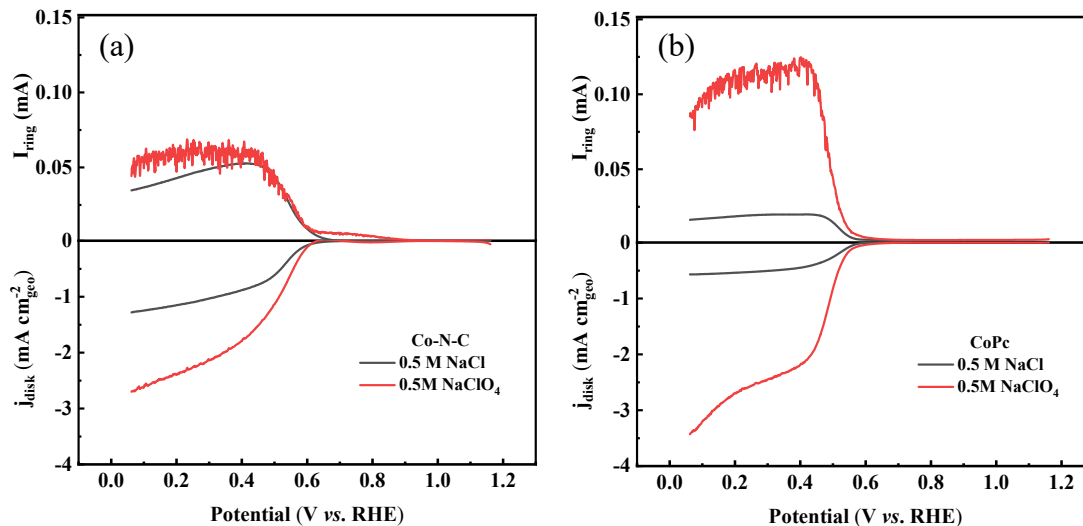

Figure S9. Linear sweep voltammetry (LSV) curves of (a) Co-N-C and (b) CoPc in 0.5M NaCl and 0.5M NaClO<sub>4</sub> in a RRDE setup with the ring current was collected on the Pt ring at a constant potential of  $+1.26 V_{\text{RHE}}$ .

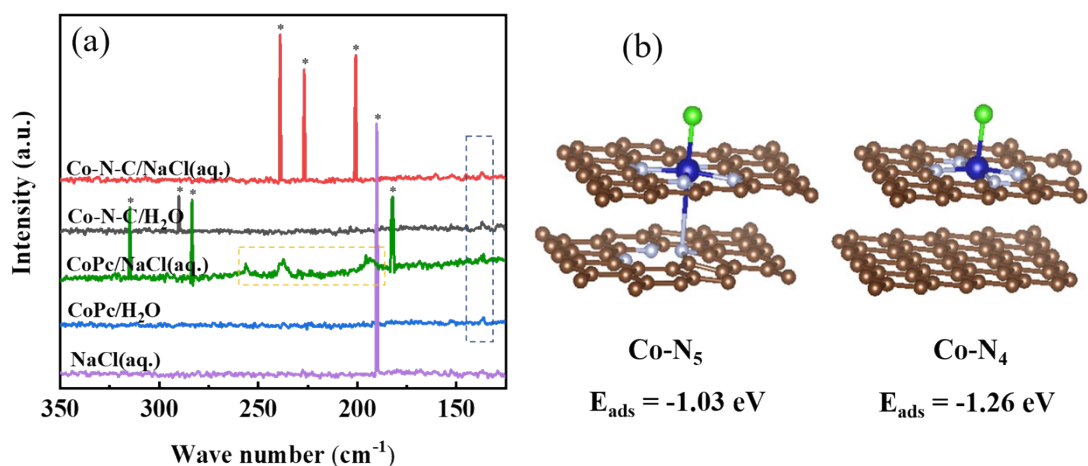

Figure S10. (a) Raman spectra of 0.5M NaCl and the interfaces between Co-N-C or CoPc and 0.5M NaCl or H<sub>2</sub>O (\* indicates signals from the environmental light), and (b) adsorption of chloride ion on Co-N<sub>5</sub> and Co-N<sub>4</sub> surfaces with adsorption energies ( $E_{\text{ads}}$ ) computed by DFT (color notation: dark blue-Co, brown-C, light blue-N, green-Cl).

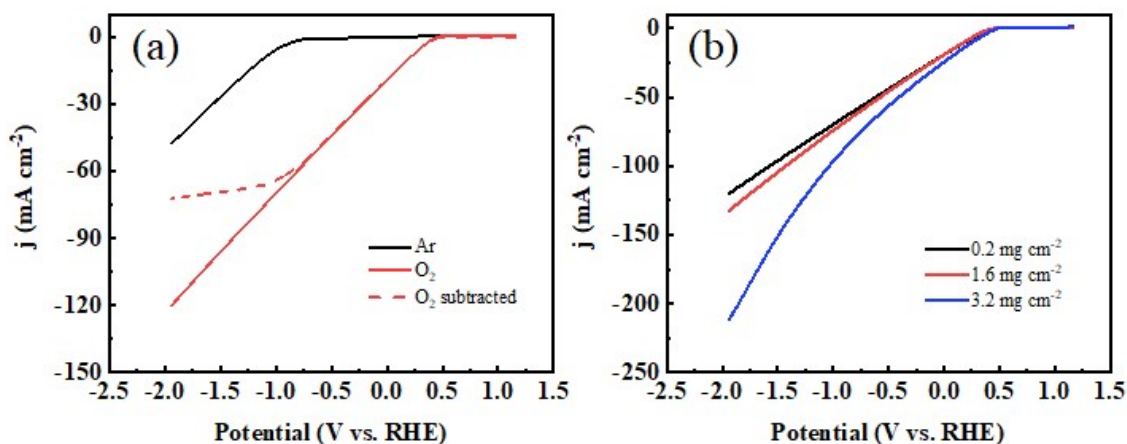

Figure S11. (a) LSV curves of Co-N-C cathode with a mass loading of 0.2 mg cm<sup>-2</sup> in flow cell under the flow of O<sub>2</sub> and Ar (the red dash line was obtained by subtracting the current under the flow of Ar); (b) LSV curves of Co-N-C cathode with a mass loading of 0.2, 1.6, 3.2 mg cm<sup>-2</sup> in flow cell under the flow of O<sub>2</sub>.

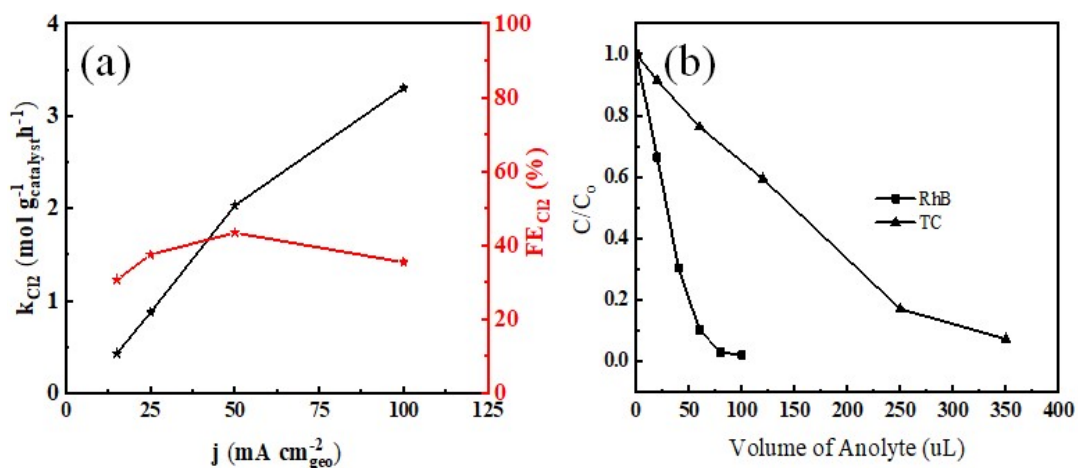

**Figure S12.** (a) Production rate (left) and Faradaic efficiency (right) of  $\text{Cl}_2$  in the anode in a triple-phase flow cell under the flow of  $\text{O}_2$  in 0.5M NaCl and (b) electrocatalytic degradation of 1 mL Rhodamine B (RhB, 20 ppm) or tetracycline (TC, 20 ppm) in one minute using different amounts of anolyte after 1 h of electrolysis at  $50 \text{ mA cm}^{-2}$ .

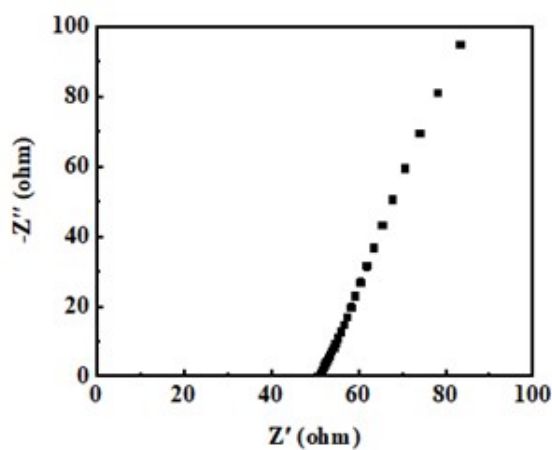

**Figure S13.** Electrochemical impedance spectroscopy of the flow cell at the open circuit potential.



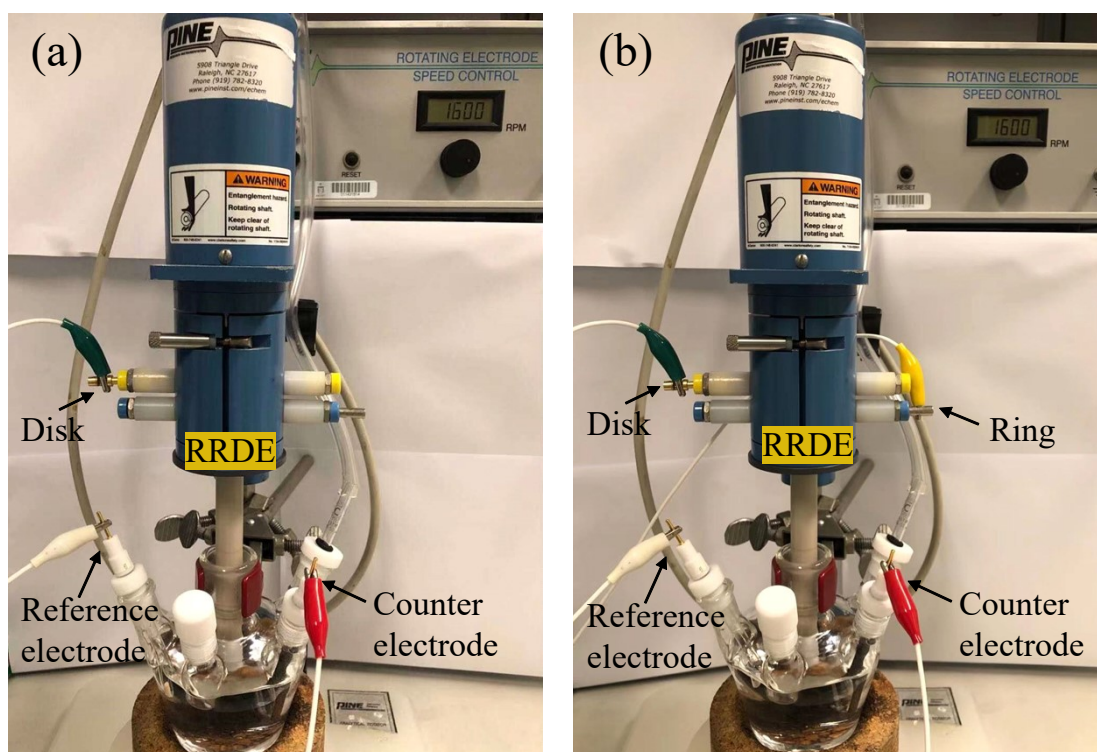

Figure S14. Images of rotating ring-disk electrode (RRDE) setup: (a) the connection to measure disk current only and (b) the connection to measure both disk current and ring current.

Table S4. Comparison of this work and recently reported catalysts for H<sub>2</sub>O<sub>2</sub> production via ORR in flow cell.

| Catalyst                         | k <sub>H<sub>2</sub>O<sub>2</sub></sub><br>(mol g <sup>-1</sup> <sub>catalyst</sub> h <sup>-1</sup> ) | FE <sub>H<sub>2</sub>O<sub>2</sub></sub><br>(%) | Electrolyte                           | j<br>(mA cm <sup>-2</sup> ) | Ref No. in<br>Figure 4c |
|----------------------------------|-------------------------------------------------------------------------------------------------------|-------------------------------------------------|---------------------------------------|-----------------------------|-------------------------|
| Co-N-C                           | 4.5                                                                                                   | 95.6                                            | 0.5M NaCl                             | 50                          | This work               |
| Co-C                             | 0.056                                                                                                 | 30                                              | PEM*                                  | 30                          | [50] <sup>1</sup>       |
| CB-10%                           | 3.66                                                                                                  | ~90                                             | SE*                                   | 200                         | [51] <sup>2</sup>       |
| NADE                             | 0.227                                                                                                 | 66.8                                            | 0.05M Na <sub>2</sub> SO <sub>4</sub> | 240                         | [52] <sup>3</sup>       |
| CMK3-20s                         | 0.837                                                                                                 | 78                                              | 0.1 M K <sub>2</sub> SO <sub>4</sub>  | ~14                         | [55] <sup>4</sup>       |
| CoTPP/KB                         | 0.475                                                                                                 | 50                                              | PEM*                                  | 95                          | [56] <sup>5</sup>       |
| CoTPP/VGCF<br>(1073 K)           | 0.1458                                                                                                | 32                                              | PEM*                                  | 80                          | [57] <sup>6</sup>       |
| MnCl-OEP/AC<br>(823 K)           | 0.018                                                                                                 | 34.1                                            | 0.6 M H <sub>2</sub> SO <sub>4</sub>  | 56.1                        | [53] <sup>7</sup>       |
| AC(HNO <sub>3</sub><br>M)+VGCF   | 3.8 0.036                                                                                             | 31                                              | ~0.6 M H <sub>2</sub> SO <sub>4</sub> | ~30                         | [54] <sup>8</sup>       |
| Co-N-C                           | 4.33                                                                                                  | 50                                              | 0.1M KOH                              | ~50                         | [15] <sup>9</sup>       |
| N-FLG-8                          | 3.11                                                                                                  | 99.8                                            | 0.1M KOH                              | 36.1                        | [58] <sup>10</sup>      |
| Ni-N <sub>2</sub> O <sub>2</sub> | 5.9                                                                                                   | 90                                              | 0.1M KOH                              | 70                          | [20] <sup>11</sup>      |
| N-O-P-C-800                      | 0.54                                                                                                  | 93.1                                            | 0.1M KOH                              | ~14                         | [59] <sup>12</sup>      |
| VGCF+XC72                        | 0.0325                                                                                                | 94                                              | 2M NaOH                               | 100                         | [60] <sup>13</sup>      |

\*PEM: proton exchange membrane with neutral DI water as carrier flow

\*SE: solid electrolyte with neutral DI water flow

## Reference

1. W. T. Li, A. Bonakdarpour, E. Gyenge and D. P. Wilkinson, *J. Appl. Electrochem.*, 2018, 48, 985-993.
2. C. Xia, Y. Xia, P. Zhu, L. Fan and H. Wang, *Science*, 2019, 366, 226-231.
3. Q. Zhang, M. Zhou, G. Ren, Y. Li, Y. Li and X. Du, *Nat. Commun.*, 2020, 11, 1731.
4. Y.-L. Wang, S.-S. Li, X.-H. Yang, G.-Y. Xu, Z.-C. Zhu, P. Chen and S.-Q. Li, *J. Mater. Chem. A*, 2019, 7, 21329-21337.
5. T. Iwasaki, Y. Masuda, H. Ogihara and I. Yamanaka, *Electrocatalysis*, 2018, 9, 236-242.
6. I. Yamanaka, S. Tazawa, T. Murayama, T. Iwasaki and S. Takenaka, *ChemSusChem*, 2010, 3, 59-62.

7. I. Yamanaka, T. Onizawa, H. Suzuki, N. Hanaizumi, N. Nishimura and S. Takenaka, *J. Phys. Chem. C*, 2012, 116, 4572-4583.
8. T. Murayama and I. Yamanaka, *J. Phys. Chem. C*, 2011, 115, 5792-5799.
9. Y. Sun, L. Silvioli, N. R. Sahraie, W. Ju, J. Li, A. Zitolo, S. Li, A. Bagger, L. Arnarson and X. Wang, *J. Am. Chem. Soc.*, 2019, 141, 12372-12381.
10. L. Li, C. Tang, Y. Zheng, B. Xia, X. Zhou, H. Xu and S. Z. Qiao, *Adv. Energy Mater.*, 2020, 10, 2000789.
11. Y. Wang, R. Shi, L. Shang, G. I. Waterhouse, J. Zhao, Q. Zhang, L. Gu and T. Zhang, *Angew. Chem., Int. Ed.*, 2020, 59, 13057-13062.
12. H.-X. Zhang, S.-C. Yang, Y.-L. Wang, J.-C. Xi, J.-C. Huang, J.-F. Li, P. Chen and R. Jia, *Electrochim. Acta*, 2019, 308, 74-82.
13. I. Yamanaka, *Catal. Surv. Asia*, 2008, 12, 78-87.
